# Supplementary material for: Reply to Sidiropoulos, K.; Tsikopoulos, K. Comment on “Oldrini et al. PHILOS Synthesis for Proximal Humerus Fractures Has High Complications and Reintervention Rates: A Systematic Review and Meta-Analysis. Life 2022, 12, 311”
Source: MDPI journal article supplement (doi:10.3390/life12081282), 2022-08-22
Supplement: s1 [file s1]

**Table S1.** Details of the included studies; Pt. (patients), M (male), F (female), DS (delto-split), (DP delto-pectoral).

| First Author, Year           | Country     | Comparative | Pt. (M-F)    | Age   | Neer Classification |     |     | Surgical approach |
|------------------------------|-------------|-------------|--------------|-------|---------------------|-----|-----|-------------------|
|                              |             |             |              |       | N2                  | N3  | N4  |                   |
| Acklin et al, 2009[1]        | Switzerland | NO          | 29 (9–20)    | 64    | N/A                 | N/A | N/A | DS                |
| Acklin et al, 2013[2]        | Switzerland | NO          | 97 (N/A)     | 62    | N/A                 | N/A | N/A | DS                |
| Aggarwal et al, 2010[3]      | India       | NO          | 47 (27–20)   | 58.5  | 11                  | 22  | 14  | DP                |
| Aliuddin et al, 2016[4]      | Pakistan    | NO          | 20 (12–8)    | 40    | 4                   | 10  | 6   | DP                |
| Bachelier et al, 2014[5]     | Germany     | NO          | 50 (20–30)   | 62.7  | 15                  | 18  | 17  | DS                |
| Bandalovic et al, 2014[6]    | Croatia     | NO          | 67 (N/A)     | N/A   | N/A                 | N/A | N/A | DP/DS             |
| Beeres et al, 2017[7]        | Switzerland | YES         | 282 (85–197) | 64    | 58                  | 153 | 74  | DP/DS             |
| Bhayana et al, 2021[8]       | India       | YES         | 84 (45–39)   | 45    | 0                   | 40  | 44  | DP/DS             |
| Björkenheim et al, 2004[9]   | Finland     | NO          | 72 (28–44)   | 67    | 38                  | 22  | 12  | DP                |
| Boesmueller et al, 2016[10]  | Austria     | NO          | 154 (61–93)  | 55.8  | 41                  | 71  | 42  | DP                |
| Borer et al, 2017[11]        | Switzerland | YES         | 62 (16–46)   | 64    | 18                  | 4   | 10  | DP/DS             |
| Boudard et al, 2014[12]      | France      | YES         | 33 (19–14)   | 49.6  | 0                   | 21  | 12  | DP                |
| Bu et al, 2021[13]           | China       | YES         | 48 (17–31)   | 66.3  | 28                  | 13  | 7   | DP                |
| Buchmann et al, 2021[14]     | Switzerland | YES         | 198 (75–123) | 64.3  | N/A                 | N/A | N/A | DP/DS             |
| Cai et al, 2012[15]          | China       | YES         | 12 (1–11)    | 72.4  | 0                   | 0   | 12  | DP                |
| Caliskan et al, 2019[16]     | Turkey      | YES         | 45 (18–27)   | 53.2  | 11                  | 21  | 13  | DS                |
| Cha et al, 2017[17]          | South Korea | YES         | 32 (8–24)    | 67.8  | 8                   | 21  | 3   | DP                |
| Chen et al, 2019[18]         | China       | YES         | 112 (37–75)  | 64.29 | 52                  | 60  | 0   | DP                |
| Chen et al, 2020[19]         | Taiwan      | YES         | 35 (13–22)   | 56.1  | 12                  | 17  | 6   | DP                |
| Cho et al, 2017[20]          | South Korea | NO          | 39 (12–27)   | 59    | 14                  | 22  | 3   | DP                |
| Cohen et al, 2009[21]        | Brazil      | NO          | 26 (12–14)   | 57    | 7                   | 10  | 7   | DP                |
| Davids et al, 2020[22]       | USA         | YES         | 75 (N/A)     | 59.9  | 40                  | 35  | 0   | DP                |
| Doshi et al, 2017[23]        | India       | NO          | 53 (24–29)   | 54.3  | 19                  | 17  | 11  | DP                |
| Erasmus et al, 2014[24]      | Italy       | NO          | 81 (39–42)   | 56    | 7                   | 40  | 35  | DP                |
| Falez et al, 2019[25]        | Italy       | NO          | 76 (26–50)   | 68.5  | 3                   | 35  | 38  | DS                |
| Faraj et al, 2011[26]        | Netherlands | YES         | 37 (N/A)     | N/A   | N/A                 | N/A | N/A | DS                |
| Fattoretto et al, 2016[27]   | Italy       | NO          | 55 (17–38)   | 63.4  | 0                   | 16  | 39  | DP/DS             |
| Fazal et al, 2009[28]        | UK          | NO          | 27 (6–21)    | 56    | 13                  | 12  | 2   | DP                |
| Fraser et al, 2020[29]       | Norway      | YES         | 60 (8–52)    | 74.7  | 0                   | 29  | 31  | DP                |
| Geiger et al, 2010[30]       | Germany     | NO          | 28 (8–20)    | 60.7  | 8                   | 12  | 8   | DP                |
| George et al, 2021[31]       | India       | NO          | 35 (25–10)   | 52    | 12                  | 21  | 14  | DP                |
| Gonc et al, 2017[32]         | Turkey      | NO          | 31 (12–19)   | 58.4  | 4                   | 14  | 13  | DS                |
| GraC.I.telli et al, 2013[33] | Brazil      | NO          | 40 (12–28)   | 61.8  | 16                  | 22  | 2   | DP                |
| GraC.I.telli et al, 2016[34] | Brazil      | YES         | 33 (8–25)    | 66.4  | 16                  | 17  | 0   | DP                |
| Handschin et al, 2008[35]    | Switzerland | NO          | 31 (11–20)   | 62    | 8                   | 13  | 10  | DP                |
| Hengg et al, 2019[36]        | Austria     | YES         | 34 (5–29)    | 76    | 5                   | 17  | 12  | DP                |

|                               |             |     |              |      |     |     |     |       |
|-------------------------------|-------------|-----|--------------|------|-----|-----|-----|-------|
| Jaura et al, 2014[37]         | India       | YES | 30 (20–10)   | 65   | 12  | 14  | 4   | DP    |
| Klitscher et al, 2008[38]     | Germany     | NO  | 30 (11–19)   | 59   | 2   | 16  | 12  | DP    |
| Koukakis et al, 2006[39]      | Greece      | NO  | 20 (8–12)    | 61.7 | 5   | 11  | 4   | DP    |
| Kumar et al, 2014[40]         | India       | NO  | 51 (35–16)   | 38   | 8   | 15  | 23  | DP    |
| Launonen et al, 2019[41]      | UK          | YES | 44 (3–41)    | 82   | 44  | 0   | 0   | N/A   |
| Lee et al, 2017[42]           | South Korea | YES | 31 (11–20)   | 58.6 | 31  | 0   | 0   | N/A   |
| Leonard et al, 2009[43]       | Ireland     | NO  | 32 (9–23)    | 61.6 | N/A | N/A | N/A | DP    |
| Lorenz et al, 2020[44]        | Austria     | YES | 31 (N/A)     | 59   | 0   | 12  | 19  | DP    |
| LuC.I.ani et al, 2020[45]     | Italy       | YES | 26 (3–23)    | 73   | 0   | 9   | 15  | DP    |
| Martinez et al, 2009[46]      | Spain       | NO  | 58 (31–27)   | 61   | 0   | 33  | 25  | DP    |
| MatejC.I.c et al, 2013[47]    | Croatia     | NO  | 59 (9–50)    | 70.5 | 0   | 32  | 27  | DP    |
| Miyazaki et al, 2012[48]      | Brazil      | NO  | 56 (19–37)   | 62   | 13  | 28  | 8   | DP    |
| Monteiro et al, 2011          | Brazil      | NO  | 33 (14–19)   | 57   | 17  | 13  | 4   | DP    |
| Moonot et al, 2007[49]        | UK          | NO  | 32 (9–23)    | 59.9 | 0   | 20  | 12  | DP    |
| Norouzi et al, 2012[50]       | Iran        | NO  | 37 (27–10)   | 50.1 | 13  | 20  | 4   | N/A   |
| Ockert et al, 2014[51]        | Germany     | NO  | 43 (12–31)   | 58.2 | N/A | N/A | N/A | DP    |
| Oh et al, 2015[52]            | Germany     | NO  | 26 (6–20)    | 67   | 0   | 17  | 9   | DS    |
| Olerud et al, 2010[53]        | Sweden      | NO  | 50 (10–40)   | 75   | 50  | 0   | 0   | DP    |
| Ortmaier et al, 2015[54]      | Austria     | YES | 30 (13–17)   | 31.3 | 0   | 10  | 20  | N/A   |
| Papadopoulos et al, 2009[55]  | Greece      | NO  | 29 (12–17)   | 62.3 | 0   | 22  | 7   | DP    |
| Parmaksizoglu et al, 2010[56] | Turkey      | NO  | 32 (10–22)   | 63   | 0   | 12  | 20  | DP    |
| Plath et al, 2019[57]         | Germany     | YES | 32 (7–25)    | 77.1 | 4   | 24  | 4   | DP/DS |
| Robinson et al, 2010[58]      | Scotland    | NO  | 47 (21–26)   | 57   | 27  | 12  | 8   | DS    |
| Seo et al, 2020[59]           | South Korea | NO  | 27 (12–15)   | 53   | 5   | 14  | 8   | DP    |
| Setaro et al, 2020[60]        | Italy       | YES | 64 (N/A)     | 61.5 | 37  | 27  | 0   | DP    |
| Shahid et al, 2008[61]        | UK          | NO  | 41 (9–32)    | N/A  | 11  | 11  | 19  | DP    |
| Shi et al, 2011[62]           | China       | NO  | 43 (15–28)   | 68.7 | 10  | 21  | 12  | DP    |
| Shin et al, 2021[63]          | South Korea | NO  | 56 (12–44)   | 74.3 | 21  | 27  | 8   | DP    |
| Siebenbürger et al, 2019[64]  | Germany     | YES | 55 (12–43)   | 76.6 | 20  | 22  | 13  | DP    |
| Sohn et al, 2017[65]          | South Korea | YES | 90 (N/A)     | 61.8 | 35  | 44  | 11  | DP/DS |
| Spross et al, 2012[66]        | Switzerland | YES | 22 (4–18)    | 75   | N/A | N/A | N/A | DP    |
| Spross et al, 2012[67]        | Switzerland | NO  | 294 (71–223) | 72.9 | N/A | N/A | N/A | DP    |
| Trepat et al, 2012            | Spain       | YES | 11 (3–8)     | 68.3 | 11  | 0   | 0   | DP    |
| Urda et al, 2012[68]          | Spain       | NO  | 15 (3–12)    | 71   | 15  | 0   | 0   | DP    |
| Vijayvargiya et al, 2016[69]  | India       | NO  | 26 (19–7)    | 46   | 5   | 12  | 9   | DS    |
| Voigt et al, 2011[70]         | Germany     | YES | 31 (N/A)     | 72   | 0   | 27  | 4   | DP    |
| Wang et al, 2019[71]          | China       | YES | 46 (13–33)   | 72.5 | 0   | 0   | 46  | DP    |
| Xue et al, 2018[72]           | China       | YES | 43 (N/A)     | 57   | 43  | 0   | 0   | DS    |
| Zeng et al, 2018[73]          | China       | YES | 181 (64–117) | 57.4 | 78  | 75  | 28  | DP    |
| Zhao et al, 2019[74]          | China       | YES | 21 (12–9)    | 69   | 0   | 15  | 6   | DP    |

1. Acklin, Y.P., et al., *Minimal Invasive PHILOS®-Plate Osteosynthesis in Proximal Humeral Fractures*. Eur J Trauma Emerg Surg, 2009. **35**(1): p. 35-9.
2. Acklin, Y.P., K. Stoffel, and C. Sommer, *A prospective analysis of the functional and radiological outcomes of minimally invasive plating in proximal humerus fractures*. Injury, 2013. **44**(4): p. 456-60.
3. Aggarwal, S., et al., *Displaced proximal humeral fractures: an Indian experience with locking plates*. J Orthop Surg Res, 2010. **5**: p. 60.
4. Aliuddin, A.M., et al., *Functional Outcome Of Proximal Humeral Fractures Treated With Philos Plate In Adults*. J Ayub Med Coll Abbottabad, 2016. **28**(2): p. 337-340.
5. Bachelier, F., et al., *Treatment for displaced proximal humerus fractures: comparison of interlocking plate fixation versus minimal invasive techniques*. Eur J Orthop Surg Traumatol, 2014. **24**(5): p. 707-14.
6. Bandalović, A., et al., *The Results of Internal Fixation of Proximal Humeral Osteoporotic Fractures with PHILOS Locking Plate*. Psychiatr Danub, 2014. **26 Suppl 2**: p. 376-81.
7. Beeres, F.J.P., et al., *Plate fixation of the proximal humerus: an international multicentre comparative study of postoperative complications*. Arch Orthop Trauma Surg, 2017. **137**(12): p. 1685-1692.
8. Bhayana, H., et al., *Outcomes of plate osteosynthesis for displaced 3-part and 4-part proximal humerus fractures with deltopectoral vs. deltoid split approach*. Eur J Trauma Emerg Surg, 2021.
9. Björkenheim, J.M., J. Pajarinen, and V. Savolainen, *Internal fixation of proximal humeral fractures with a locking compression plate: a retrospective evaluation of 72 patients followed for a minimum of 1 year*. Acta Orthop Scand, 2004. **75**(6): p. 741-5.
10. Boesmueller, S., et al., *Risk factors for humeral head necrosis and non-union after plating in proximal humeral fractures*. Injury, 2016. **47**(2): p. 350-5.
11. Borer, J., et al., *Mid-term results of minimally invasive deltoid-split versus standard open deltopectoral approach for PHILOS™ (proximal humeral internal locking system) osteosynthesis in proximal humeral fractures*. Eur J Trauma Emerg Surg, 2020. **46**(4): p. 825-834.
12. Boudard, G., et al., *Locking plate fixation versus antegrade nailing of 3- and 4-part proximal humerus fractures in patients without osteoporosis. Comparative retrospective study of 63 cases*. Orthop Traumatol Surg Res, 2014. **100**(8): p. 917-24.
13. Bu, G., et al., *MutiLoc Nail Versus Philos Plate in Treating Proximal Humeral Fractures: A Retrospective Study Among the Elderly*. Geriatr Orthop Surg Rehabil, 2021. **12**: p. 21514593211043961.
14. Buchmann, L., et al., *Proximal humerus fractures (PHFs): comparison of functional outcome 1 year after minimally invasive plate osteosynthesis (MIPO) versus open reduction internal fixation (ORIF)*. Eur J Trauma Emerg Surg, 2021.
15. Cai, M., et al., *Internal fixation versus shoulder hemiarthroplasty for displaced 4-part proximal humeral fractures in elderly patients*. Orthopedics, 2012. **35**(9): p. e1340-6.
16. Çaliskan, E. and Ö. Doğan, *PHILOS plate versus nonoperative treatment in 2-, 3-, and 4-part proximal humeral fractures: Comparison with healthy control subjects*. J Orthop Surg (Hong Kong), 2019. **27**(3): p. 2309499019875169.
17. Cha, S.M., H.D. Shin, and S.J. Hwang, *Temporary ipsilateral stiff shoulder after operative fixation of distal radial fractures*. J Shoulder Elbow Surg, 2017. **26**(6): p. 923-930.

18. Chen, C., et al., *[Clinical outcomes of open reduction and internal fixation in treating Gustilo type I and II patients with open distal humeral fractures]*. Zhongguo Gu Shang, 2019. **32**(4): p. 350-354.
19. Chen, C.Y., et al., *Preliminary clinical and radiographic outcomes of proximal humeral fractures: comparison of ALPS and PHILOS plating in Asian patients in Taiwan*. J Orthop Surg Res, 2020. **15**(1): p. 364.
20. Cho, C.H., D.H. Kim, and B.S. Kim, *Radiographic and clinical results of tension suture fixation using two washers with PHILOS plate for proximal humeral fractures*. Injury, 2017. **48**(2): p. 464-468.
21. Cohen, M., et al., *OSTEOSYNTHESIS OF PROXIMAL HUMERAL END FRACTURES WITH FIXED-ANGLE PLATE AND LOCKING SCREWS: TECHNIQUE AND RESULTS*. Rev Bras Ortop, 2009. **44**(2): p. 106-11.
22. Davids, S., et al., *Comparison of Locked Plating of Varus Displaced Proximal Humeral Fractures With and Without Fibula Allograft Augmentation*. J Orthop Trauma, 2020. **34**(4): p. 186-192.
23. Doshi, C., et al., *Treatment of Proximal Humerus Fractures using PHILOS Plate*. J Clin Diagn Res, 2017. **11**(7): p. Rc10-rc13.
24. Erasmo, R., G. Guerra, and L. Guerra, *Fractures and fracture-dislocations of the proximal humerus: A retrospective analysis of 82 cases treated with the Philos<sup>®</sup> locking plate*. Injury, 2014. **45 Suppl 6**: p. S43-8.
25. Falez, F., et al., *Low complication rates in Minimally Invasive Plate Osteosynthesis (MIPO) for proximal humeral fractures at 5 years of follow-up*. Injury, 2019. **50 Suppl 2**: p. S34-s39.
26. Faraj, D., et al., *Results of 131 consecutive operated patients with a displaced proximal humerus fracture: an analysis with more than two years follow-up*. Eur J Orthop Surg Traumatol, 2011. **21**(1): p. 7-12.
27. Fattoretto, D., A. Borgo, and C. Iacobellis, *The treatment of complex proximal humeral fractures: analysis of the results of 55 cases treated with PHILOS plate*. Musculoskelet Surg, 2016. **100**(2): p. 109-14.
28. Fazal, M.A. and F.S. Haddad, *Philos plate fixation for displaced proximal humeral fractures*. J Orthop Surg (Hong Kong), 2009. **17**(1): p. 15-8.
29. Fraser, A.N., et al., *Reverse Shoulder Arthroplasty Is Superior to Plate Fixation at 2 Years for Displaced Proximal Humeral Fractures in the Elderly: A Multicenter Randomized Controlled Trial*. J Bone Joint Surg Am, 2020. **102**(6): p. 477-485.
30. Geiger, E.V., et al., *Functional outcome and complications following PHILOS plate fixation in proximal humeral fractures*. Acta Orthop Traumatol Turc, 2010. **44**(1): p. 1-6.
31. George, P.K., et al., *Functional Outcome and Complications in Management of Proximal Humerus Fractures Operated with Proximal Humerus Locking Plate*. Malays Orthop J, 2021. **15**(2): p. 47-54.
32. Göncü, U., et al., *Minimally invasive plate osteosynthesis with PHILOS plate for proximal humerus fractures*. Acta Orthop Traumatol Turc, 2017. **51**(1): p. 17-22.
33. Gracitelli, M.E.C., et al., *Outcomes evaluation of locking plate osteosynthesis in displaced fractures of the proximal humerus*. Rev Bras Ortop, 2013. **48**(6): p. 491-499.
34. Gracitelli, M.E., et al., *Locking intramedullary nails compared with locking plates for two- and three-part proximal humeral surgical neck fractures: a randomized controlled trial*. J Shoulder Elbow Surg, 2016. **25**(5): p. 695-703.
35. Handschin, A.E., et al., *Functional results of angular-stable plate fixation in displaced proximal humeral fractures*. Injury, 2008. **39**(3): p. 306-13.

36. Hengg, C., et al., *Cement augmentation of the proximal humerus internal locking system in elderly patients: a multicenter randomized controlled trial*. Arch Orthop Trauma Surg, 2019. **139**(7): p. 927-942.
37. Jaura, G., J. Sikdar, and S. Singh, *Long Term Results of PHILOS Plating and Percutaneous K-Wire Fixation in Proximal Humerus Fractures in The Elderly*. Malays Orthop J, 2014. **8**(1): p. 4-7.
38. Klitscher, D., et al., *Osteosynthesis of Proximal Humeral Fractures with the Fixed Angle PHILOS-plate*. Eur J Trauma Emerg Surg, 2008. **34**(1): p. 29-36.
39. Koukakis, A., et al., *Fixation of proximal humerus fractures using the PHILOS plate: early experience*. Clin Orthop Relat Res, 2006. **442**: p. 115-20.
40. Kumar, G.N., et al., *Surgical treatment of proximal humerus fractures using PHILOS plate*. Chin J Traumatol, 2014. **17**(5): p. 279-84.
41. Launonen, A.P., et al., *Operative versus non-operative treatment for 2-part proximal humerus fracture: A multicenter randomized controlled trial*. PLoS Med, 2019. **16**(7): p. e1002855.
42. Lee, W., J.Y. Park, and Y.M. Chun, *Operative Treatment of 2-Part Surgical Neck Fracture of the Humerus: Intramedullary Nail Versus Locking Compression Plate With Technical Consideration*. J Orthop Trauma, 2017. **31**(9): p. e270-e274.
43. Leonard, M., et al., *The use of locking plates in proximal humeral fractures: Comparison of outcome by patient age and fracture pattern*. Int J Shoulder Surg, 2009. **3**(4): p. 85-9.
44. Lorenz, G., et al., *Complication rate after operative treatment of three- and four-part fractures of the proximal humerus: locking plate osteosynthesis versus proximal humeral nail*. Eur J Trauma Emerg Surg, 2021. **47**(6): p. 2055-2064.
45. Luciani, P., et al., *Angular stable plate versus reverse shoulder arthroplasty for proximal humeral fractures in elderly patient*. Musculoskelet Surg, 2022. **106**(1): p. 43-48.
46. Martinez, A.A., J. Cuenca, and A. Herrera, *Philos plate fixation for proximal humeral fractures*. J Orthop Surg (Hong Kong), 2009. **17**(1): p. 10-4.
47. Matejčić, A., et al., *Internal fixation with locking plate of 3- and 4-part proximal humeral fractures in elderly patients: complications and functional outcome*. Acta Clin Croat, 2013. **52**(1): p. 17-22.
48. Miyazaki, A.N., et al., *EVALUATION OF THE COMPLICATIONS OF SURGICAL TREATMENT OF FRACTURES OF THE PROXIMAL EXTREMITY OF THE HUMERUS USING A LOCKING PLATE*. Rev Bras Ortop, 2012. **47**(5): p. 568-74.
49. Moonot, P., N. Ashwood, and M. Hamlet, *Early results for treatment of three- and four-part fractures of the proximal humerus using the PHILOS plate system*. J Bone Joint Surg Br, 2007. **89**(9): p. 1206-9.
50. Norouzi, M., et al., *Clinical results of using the proximal humeral internal locking system plate for internal fixation of displaced proximal humeral fractures*. Am J Orthop (Belle Mead NJ), 2012. **41**(5): p. E64-8.
51. Ockert, B., et al., *Position of polyaxial versus monoaxial screws in locked plating for proximal humeral fractures: analysis of a prospective randomized study*. Eur J Orthop Surg Traumatol, 2014. **24**(5): p. 747-52.
52. Oh, H.K., et al., *Lessons learned from treating patients with unstable multifragmentary fractures of the proximal humerus by minimal invasive plate osteosynthesis*. Arch Orthop Trauma Surg, 2015. **135**(2): p. 235-242.
53. Olerud, P., et al., *Quality of life and functional outcome after a 2-part proximal humeral fracture: a prospective cohort study on 50 patients treated with a locking plate*. J Shoulder Elbow Surg, 2010. **19**(6): p. 814-22.

54. Ortmaier, R., et al., *Comparison between minimally invasive, percutaneous osteosynthesis and locking plate osteosynthesis in 3-and 4-part proximal humerus fractures*. BMC Musculoskelet Disord, 2015. **16**: p. 297.
55. Papadopoulos, P., et al., *Mid-term results of internal fixation of proximal humeral fractures with the Philos plate*. Injury, 2009. **40**(12): p. 1292-6.
56. Parmaksizoglu, A.S., et al., *Locking plate fixation of three- and four-part proximal humeral fractures*. Acta Orthop Traumatol Turc, 2010. **44**(2): p. 97-104.
57. Plath, J.E., et al., *Locking nail versus locking plate for proximal humeral fracture fixation in an elderly population: a prospective randomised controlled trial*. BMC Musculoskelet Disord, 2019. **20**(1): p. 20.
58. Robinson, C.M., et al., *Proximal humeral fractures with a severe varus deformity treated by fixation with a locking plate*. J Bone Joint Surg Br, 2010. **92**(5): p. 672-8.
59. Seo, J.B., et al., *Assessment of the efficacy of the far cortical locking technique in proximal humeral fractures: a comparison with the conventional bi-cortical locking technique*. BMC Musculoskelet Disord, 2020. **21**(1): p. 800.
60. Setaro, N., et al., *Surgical management of 2- or 3-part proximal humeral fractures: comparison of plate, nail and K-wires*. Musculoskelet Surg, 2022. **106**(2): p. 163-167.
61. Shahid, R., et al., *Outcome of proximal humerus fractures treated by PHILOS plate internal fixation. Experience of a district general hospital*. Acta Orthop Belg, 2008. **74**(5): p. 602-8.
62. Shi, H.F., et al., *Management of proximal humeral fractures in elderly patients with uni- or polyaxial locking osteosynthesis system*. Arch Orthop Trauma Surg, 2011. **131**(4): p. 541-7.
63. Shin, W.C., et al., *High bone union rate using a locking plate for proximal humeral fractures in patients older than 70 years: importance of the medial column*. Eur J Trauma Emerg Surg, 2021.
64. Siebenb rger, G., et al., *Screw-tip augmentation versus standard locked plating of displaced proximal humeral fractures: a retrospective comparative cohort study*. J Shoulder Elbow Surg, 2019. **28**(7): p. 1326-1333.
65. Sohn, H.S., et al., *Clinical comparison between open plating and minimally invasive plate osteosynthesis for displaced proximal humeral fractures: A prospective randomized controlled trial*. Injury, 2017. **48**(6): p. 1175-1182.
66. Spross, C., et al., *Surgical treatment of Neer Group VI proximal humeral fractures: retrospective comparison of PHILOS® and hemiarthroplasty*. Clin Orthop Relat Res, 2012. **470**(7): p. 2035-42.
67. Spross, C., et al., *The PHILOS plate for proximal humeral fractures--risk factors for complications at one year*. J Trauma Acute Care Surg, 2012. **72**(3): p. 783-92.
68. Urda, A., et al., *Management of displaced surgical neck fractures of the humerus: health related quality of life, functional and radiographic results*. Injury, 2012. **43 Suppl 2**: p. S12-9.
69. Vijayvargiya, M., A. Pathak, and S. Gaur, *Outcome Analysis of Locking Plate Fixation in Proximal Humerus Fracture*. J Clin Diagn Res, 2016. **10**(8): p. Rc01-5.
70. Voigt, C., et al., *Are polyaxially locked screws advantageous in the plate osteosynthesis of proximal humeral fractures in the elderly? A prospective randomized clinical observational study*. J Orthop Trauma, 2011. **25**(10): p. 596-602.
71. Wang, H., et al., *Locking Plate Use with or without Strut Support for Varus Displaced Proximal Humeral Fractures in Elderly Patients*. JB JS Open Access, 2019. **4**(3).
72. Xue, G., et al., *Titanium mini locking plate with trans-osseous sutures for the treatment of humeral greater tuberosity fracture osteosynthesis versus PHILOS: a retrospective view*. Int Orthop, 2018. **42**(10): p. 2467-2473.

73. Zeng, L.Q., et al., *Influence of Medial Support Screws on the Maintenance of Fracture Reduction after Locked Plating of Proximal Humerus Fractures*. Chin Med J (Engl), 2018. **131**(15): p. 1827-1833.
74. Zhao, L., et al., *Comparison of the Effects of Proximal Humeral Internal Locking System (PHILOS) Alone and PHILOS Combined with Fibular Allograft in the Treatment of Neer Three- or Four-part Proximal Humerus Fractures in the Elderly*. Orthop Surg, 2019. **11**(6): p. 1003-1012.
